# Supplementary material
Source: PubMed Central journal article supplement (PMC5879699)
Supplement: pnas.201720431SI.pdf [file pnas.201720431SI.pdf]

# Supporting Information

Cingöz and Goff 10.1073/pnas.1720431115

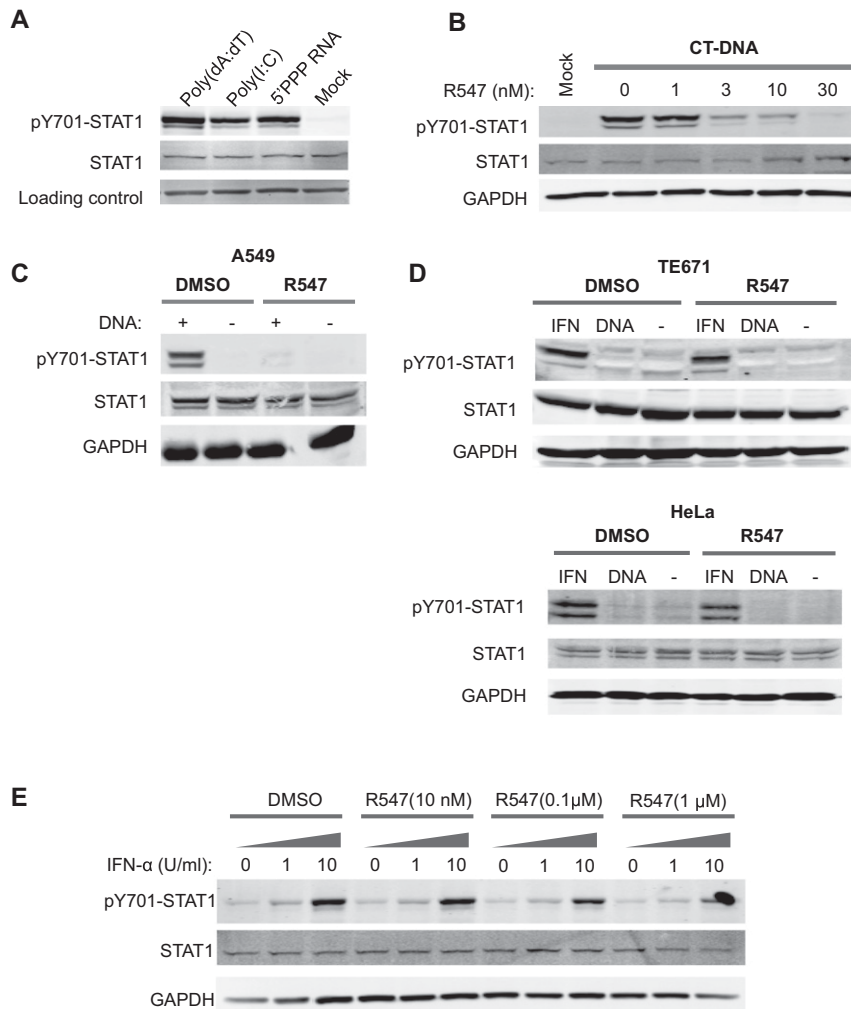

**Fig. S1.** The effect of CDK inhibition on STAT activation. (A) THP-1 cells were transfected with 4 μg/mL of poly(dA:dT), poly(I:C), 5' triphosphate RNA (5'PPP RNA), or mock. Total cell lysates were analyzed for STAT1 activation by Western blot 2 h posttransfection. (B) THP-1 cells were treated with the indicated amounts of the CDK inhibitor R547 (0–30 nM) and challenged with 4 μg/mL DNA transfection. Lysates were analyzed as in A. (C) A549 cells were transfected with poly(I:C) (4 μg/mL) or mock, in the presence of R547 (3 nM) or DMSO. Lysates were analyzed as in A. (D) TE671 and HeLa cells were treated with IFN-α (10 U/mL) or transfected with DNA (4 μg/mL) in the presence of R547 (10 nM) or DMSO. Lysates were analyzed as in A. (E) THP-1 cells were challenged with different concentrations of IFN-α (0, 1, 10 U/mL) in the presence of different concentrations of R547 (0, 10 nM, 100 nM, 1 μM). Lysates were collected 30 min later and analyzed by Western blot. Results are representative of at least two independent experiments.





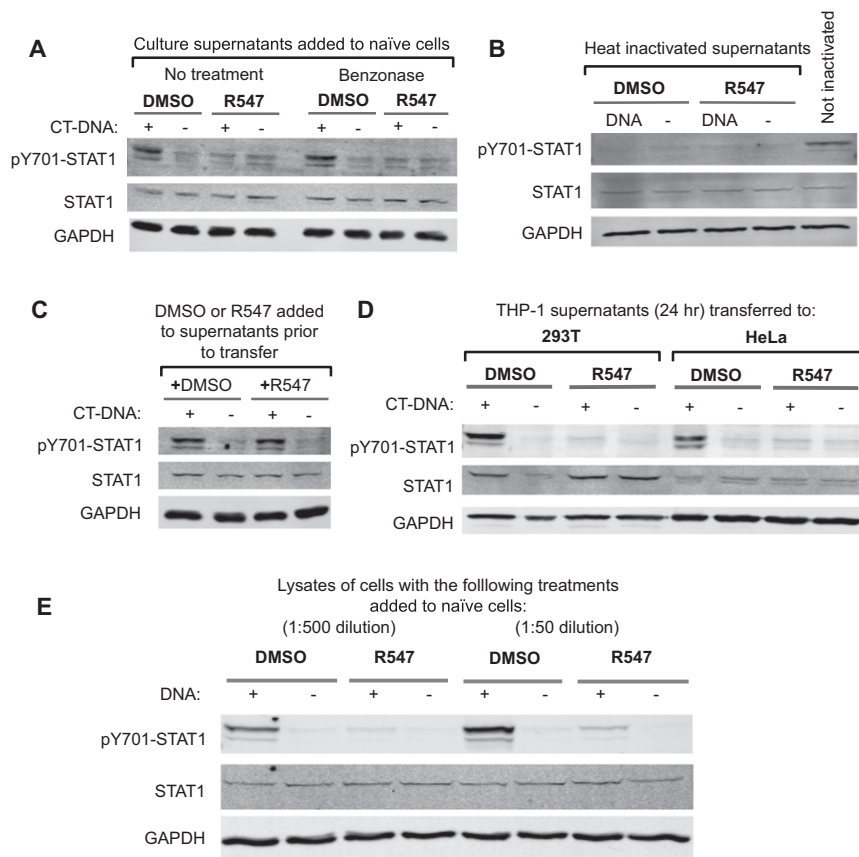

**Fig. S4.** CDK inhibition prevents the production of a cytokine in culture supernatants. (A) THP-1 cells were treated with R547 (10 nM) or DMSO, and transfected with DNA (4  $\mu$ g/mL) or mock. Supernatants were collected 4 h later, treated with benzonase or left untreated, and applied to naïve THP-1 cells. Lysates were analyzed by Western blot 2 h after transfer. (B) Experiment was performed as in A except supernatants were heat inactivated at 95  $^{\circ}$ C for 10 min and allowed to cool to room temperature before their application to recipient cells. (C) Culture supernatants from DNA- or mock-transfected THP-1 cells (without drugs) were collected 4 h after transfection. R547 or DMSO were then added to these supernatants, and they were applied to recipient cells. Lysates were analyzed as in A. (D) Experiment performed as in A, where the recipient cells were HEK293T or HeLa. (E) THP-1 cells were treated with R547 (10 nM) or DMSO, and transfected with DNA (4  $\mu$ g/mL) or mock. Cells were lysed, lysates diluted 1:50 or 1:500 in media, then added onto recipient cells. Lysates of the recipient cells were analyzed by Western blot 1 h later. Results are representative of at least two independent experiments.



**Table S1. CDK inhibitors used in this study**

| Inhibitor name           | Target | IC50 Value* (nM) | Reference          |
|--------------------------|--------|------------------|--------------------|
| R547                     | CDK1   | 2 ( $K_i$ )      | Depinto et al. (8) |
|                          | CDK2   | 3 ( $K_i$ )      |                    |
|                          | CDK4   | 1 ( $K_i$ )      |                    |
| Dinaciclib (SCH727965)   | CDK1   | 3                | Parry et al. (12)  |
|                          | CDK2   | 1                |                    |
|                          | CDK5   | 1                |                    |
|                          | CDK9   | 4                |                    |
| AZD5438                  | CDK1   | 16               | Byth et al. (13)   |
|                          | CDK2   | 6                |                    |
|                          | CDK9   | 20               |                    |
| SNS-032 (BMS-387032)     | CDK2   | 38–48            | Conroy et al. (14) |
|                          | CDK7   | 62               |                    |
|                          | CDK9   | 4                |                    |
| Palbociclib (PD-0332991) | CDK4   | 9–11             | Fry et al. (15)    |
|                          | CDK6   | 15               |                    |

\*Concentrations for R547 are given as  $K_i$  values.

**Table S2. Oligonucleotides used in the study**

| Target                                    | Primers, probe set or oligonucleotide               | Source             |
|-------------------------------------------|-----------------------------------------------------|--------------------|
| <b>SYBR green primers</b>                 |                                                     |                    |
| IFN- $\beta$ (F)                          | AGGACAGGATGAACTTTGAC                                | Current paper      |
| IFN- $\beta$ (R)                          | TGATAGACATTAGCCAGGAG                                | Current paper      |
| CXCL10 (F)                                | TGGCATTCAAGGAGTACCTC                                | Current paper      |
| CXCL10 (R)                                | TTGTAGCAATGATCTCAACAGG                              | Current paper      |
| ISG54 (F)                                 | TGTTCCATTCTTGCCAGCCTC                               | Current paper      |
| ISG54 (R)                                 | CAGTTGTTTCGCTACAGGAGTAAGC                           | Current paper      |
| MX1 (F)                                   | AGACAGGACCATCGGAATCTTG                              | Current paper      |
| MX1 (R)                                   | TTCTTCAGGTGGAACACGAGG                               | Current paper      |
| IFIT1 (F)                                 | CCTGGCTAAGCAAACCCCTG                                | Current paper      |
| IFIT1 (R)                                 | CATCGTCATCAATGGATAACTCCC                            | Current paper      |
| ISG15 (F)                                 | TCTGAACATCCTGGTGAGGAATAAC                           | Current paper      |
| ISG15 (R)                                 | AAGGTCAAGCAGAACAGGTCGTC                             | Current paper      |
| GAPDH (F)                                 | TCGGAGTCAACGGATTG                                   | Current paper      |
| GAPDH (R)                                 | GCATCGCCCCACTTGATT                                  | Current paper      |
| CCL5 (F)                                  | CTCGCTGTCATCCTCATTCG                                | Current paper      |
| CCL5 (R)                                  | TACTCCTTGATGTGGGCAGC                                | Current paper      |
| CDK1 (F)                                  | ACCTATGGAGTTGTGTATAAGG                              | Sigma              |
| CDK1 (R)                                  | GACTGACTATATTTGGATGACG                              | Sigma              |
| CDK2 (F)                                  | TGTTATCGCAAATGCTGC                                  | Sigma              |
| CDK2 (R)                                  | TCAAGAAGGCTATCAGAGTC                                | Sigma              |
| CDK4 (F)                                  | AGAATCTACAGCTACCAGATG                               | Sigma              |
| CDK4 (R)                                  | AGAGTTTCCACAGAAGAGAG                                | Sigma              |
| CDK5 (F)                                  | CCTGAGATTGTAAGTCATTCC                               | Sigma              |
| CDK5 (R)                                  | CCCCATTCCTGTTTATTAGC                                | Sigma              |
| CDK6 (F)                                  | GGATATGATGTTTCAGCTTCTC                              | Sigma              |
| CDK6 (R)                                  | TCTGGAAACTATAGATGCGG                                | Sigma              |
| CDK7 (F)                                  | CTAGGATGTATGGTGTAGGTG                               | Sigma              |
| CDK7 (R)                                  | AAGGAACCCTTAGAAGTAACTC                              | Sigma              |
| CDK8 (F)                                  | AGCAAGGCATTATACCAAAG                                | Sigma              |
| CDK8 (R)                                  | CTTTATCTGCAGGAAATCCC                                | Sigma              |
| CDK9 (F)                                  | TGAGATTTGTCGAACCAAAG                                | Sigma              |
| CDK9 (R)                                  | TTTCTGTGGATGTAGTAGAGG                               | Sigma              |
| <b>Taqman primer/probe sets</b>           |                                                     |                    |
| IFN- $\beta$                              | Hs01077958_s1                                       | Thermo Fisher      |
| CXCL10                                    | Hs00171042_m1                                       | Thermo Fisher      |
| ISG54                                     | Hs00533665_m1                                       | Thermo Fisher      |
| Actin                                     | Hs99999903_m1                                       | Thermo Fisher      |
| GAPDH                                     | 4310884E                                            | Thermo Fisher      |
| <b>siRNAs</b>                             |                                                     |                    |
| CDK1                                      | SASI_Hs01_00044053                                  | Sigma              |
| CDK2                                      | SASI_Hs01_00060175                                  | Sigma              |
| CDK4                                      | SASI_Hs01_00122489                                  | Sigma              |
| CDK5                                      | SASI_Hs01_00159314                                  | Sigma              |
| CDK6                                      | SASI_Hs01_00048790                                  | Sigma              |
| CDK7                                      | SASI_Hs01_00214780                                  | Sigma              |
| CDK8                                      | SASI_WI_00000018                                    | Sigma              |
| CDK9                                      | SASI_Hs01_00112403                                  | Sigma              |
| Control                                   | SIC001                                              | Sigma              |
| <b>Immunostimulatory oligonucleotides</b> |                                                     |                    |
| 526                                       | GGGTACAGATCTACTAGTGATCTATGACTGATCTGTACATGATCTACAGGG | Herzner et al. (1) |
| 529                                       | GGGTGTAGATCATGTACAGATCAGTCATAGATCACTAGTAGATCTGTAGGG | Herzner et al. (1) |

1. Herzner AM, et al. (2015) Sequence-specific activation of the DNA sensor cGAS by Y-form DNA structures as found in primary HIV-1 cDNA. *Nat Immunol* 16:1025–1033.
